# Supplementary material for: Indolent Presentations of Leukemic Lung Disease in Acute Myeloid Leukemia
Source: bioRxiv or medRxiv preprint supplement (doi:10.1101/2020.10.12.20211276), 2020-10-14

**Figure E2: Patient course diagrams.** New AML (N-AML\_1-6) patient courses cover duration of hospital admission. Relapsed AML (RR-AML\_1-12) patient courses include blast data prior to admission (up to 6 months prior) and duration of hospital admission.

**N-AML\_1**

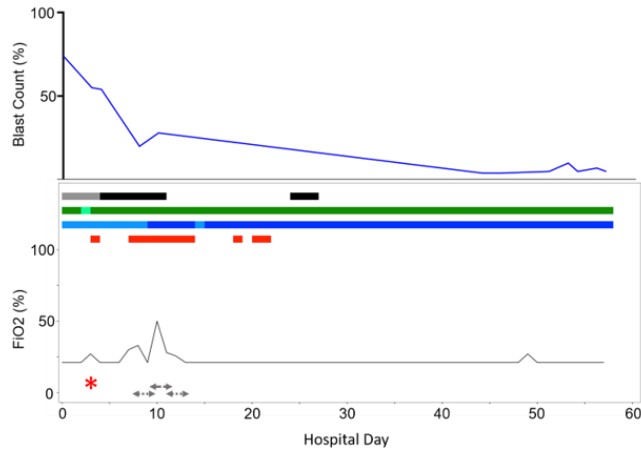

- Chemotherapy
- Hydroxyurea
- Prophylactic Antibiotics
- Broad Spectrum Antibiotics
- Prophylactic Antifungal
- Antifungal
- Febrile
- IPPV
- NIPPV
- HFNC/Aerosol mask
- Nasal Cannula
- \* Bronchoscopy

**N-AML\_2**

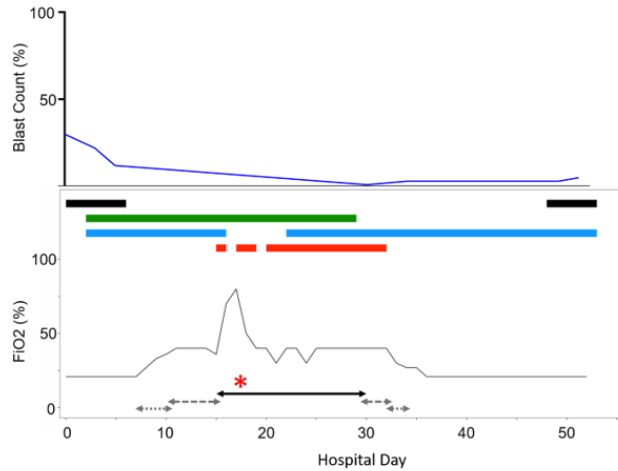

**N-AML\_3**

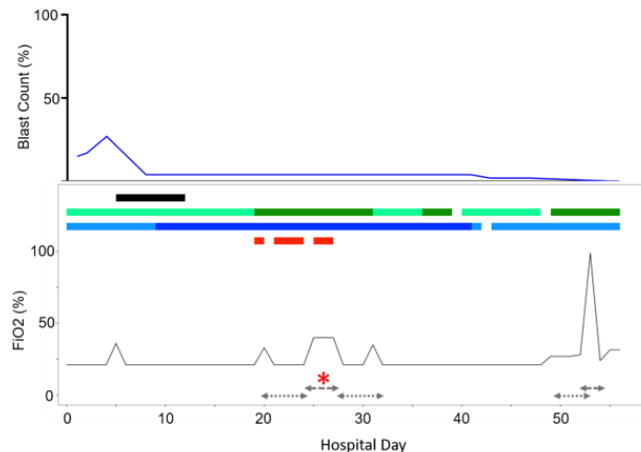

### N-AML\_4

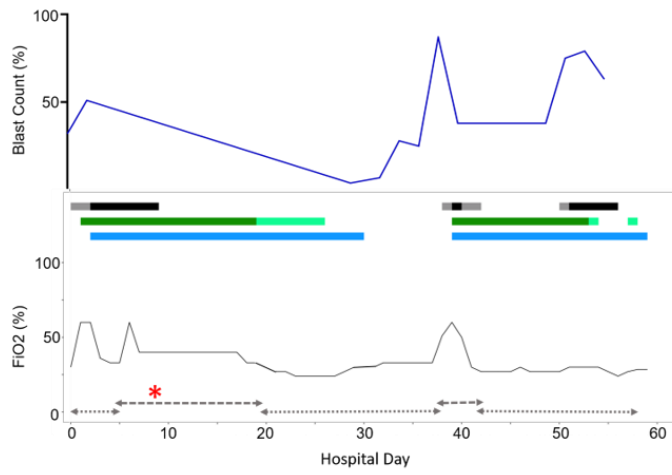

- Chemotherapy
- Hydroxyurea
- Prophylactic Antibiotics
- Broad Spectrum Antibiotics
- Prophylactic Antifungal
- Antifungal
- Febrile
- IPPV
- NIPPV
- HFNC/Aerosol mask
- Nasal Cannula
- \* Bronchoscopy

### N-AML\_5

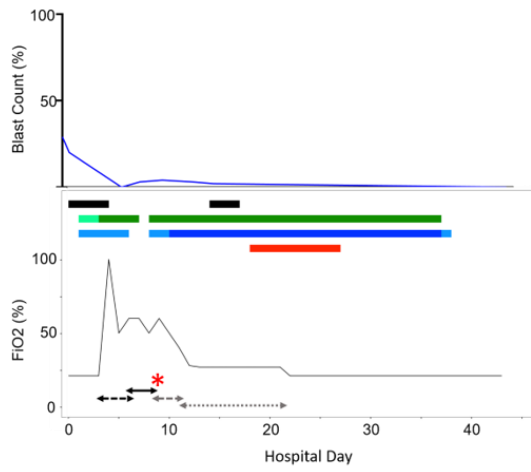

### N-AML\_6

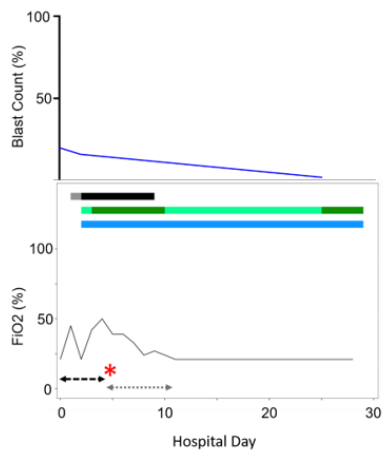

### RR-AML\_1

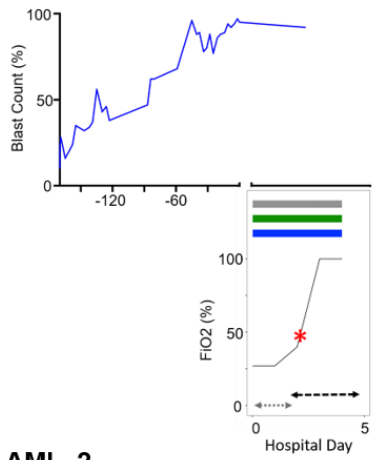

- Chemotherapy
  - Hydroxyurea
  - Prophylactic Antibiotics
  - Broad Spectrum Antibiotics
  - Prophylactic Antifungal
  - Antifungal
  - Febrile
- IPPV
  - NIPPV
  - HFNC/Aerosol mask
  - Nasal Cannula
  - \* Bronchoscopy

### RR-AML\_2

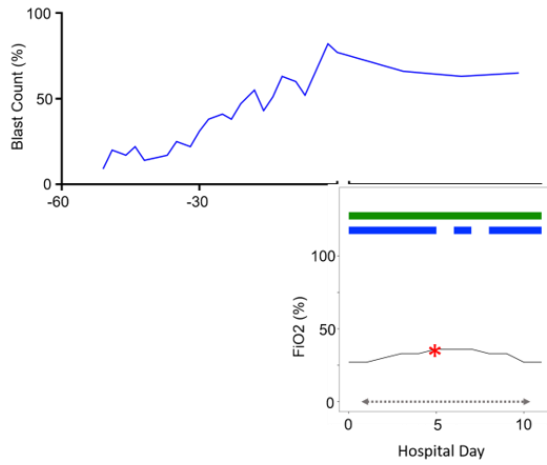

### RR-AML\_3

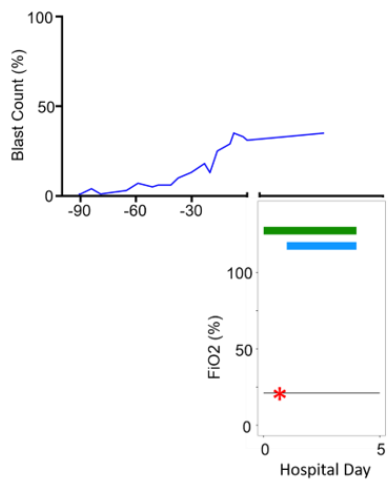

**RR-AML\_5**

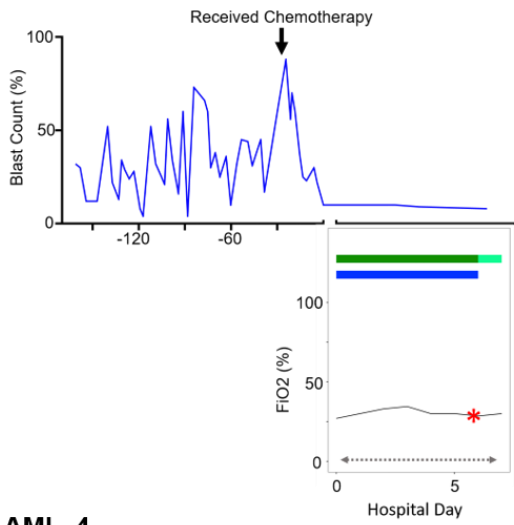

- Chemotherapy
- Hydroxyurea
- Prophylactic Antibiotics
- Broad Spectrum Antibiotics
- Prophylactic Antifungal
- Antifungal
- Febrile
- IPPV
- NIPPV
- HFNC/Aerosol mask
- Nasal Cannula
- \* Bronchoscopy

**RR-AML\_4**

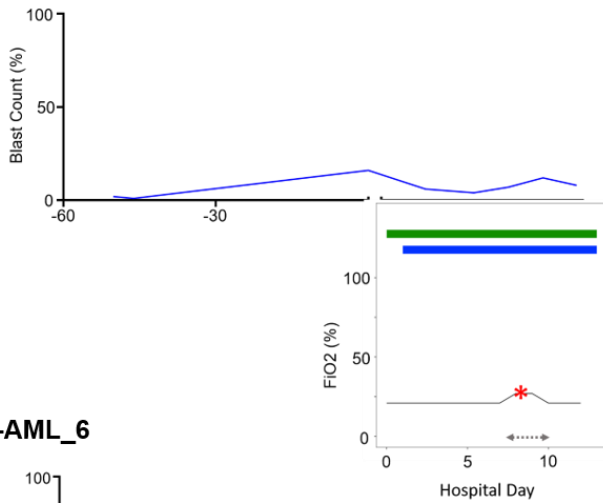

**RR-AML\_6**

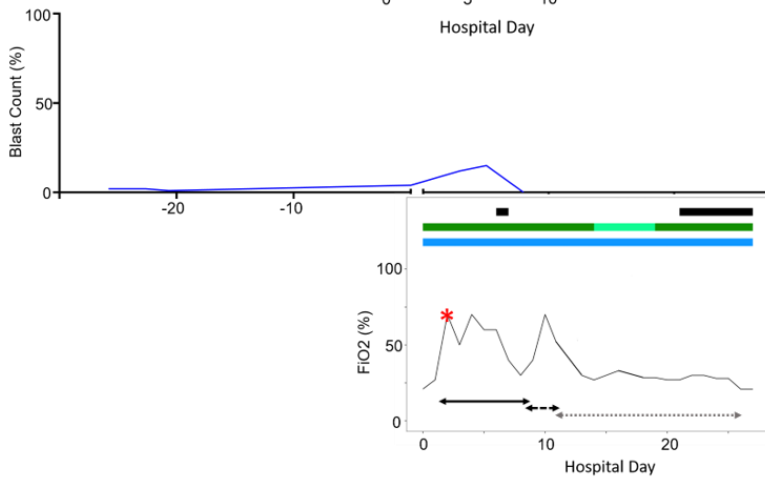

### RR-AML\_7

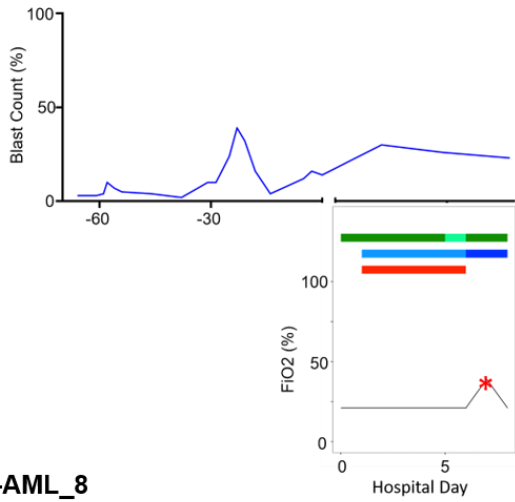

- Chemotherapy
  - Hydroxyurea
  - Prophylactic Antibiotics
  - Broad Spectrum Antibiotics
  - Prophylactic Antifungal
  - Antifungal
  - Febrile
- IPPV
  - NIPPV
  - HFNC/Aerosol mask
  - Nasal Cannula
  - \* Bronchoscopy

### RR-AML\_8

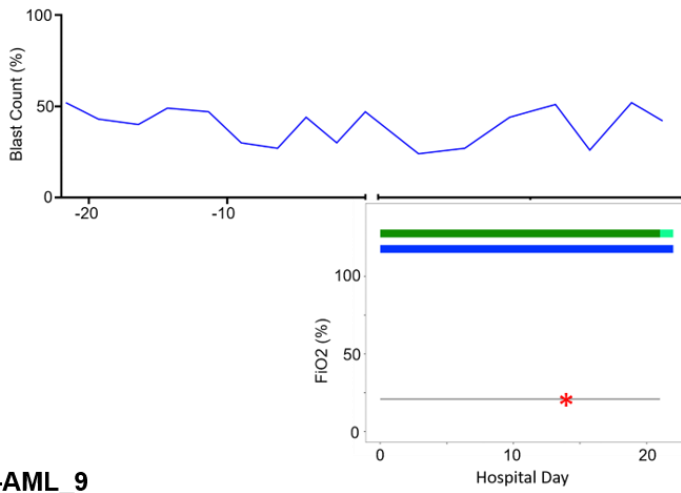

### RR-AML\_9

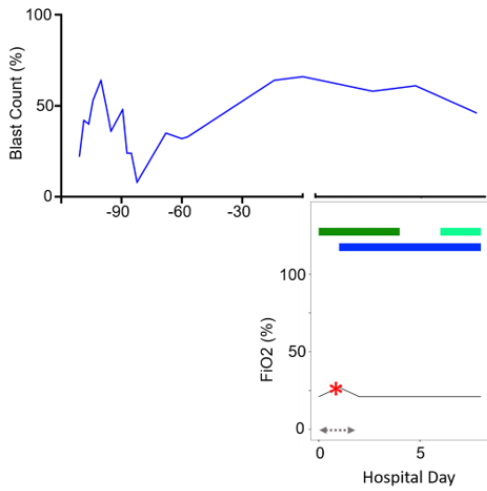

### RR-AML\_10

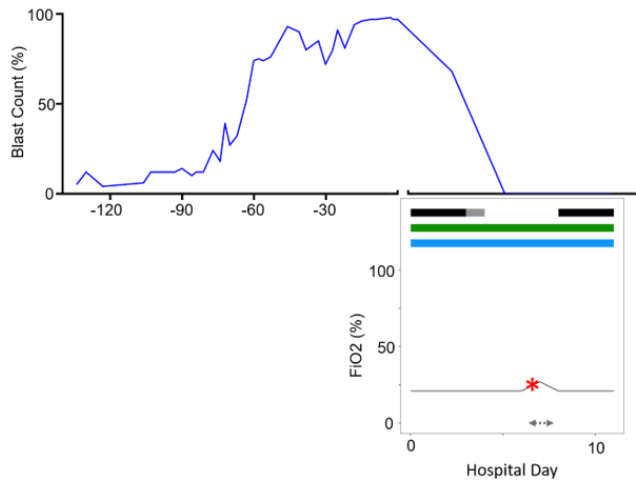

- Chemotherapy
  - Hydroxyurea
  - Prophylactic Antibiotics
  - Broad Spectrum Antibiotics
  - Prophylactic Antifungal
  - Antifungal
  - Febrile
- IPPV
  - NIPPV
  - HFNC/Aerosol mask
  - Nasal Cannula
  - \* Bronchoscopy

### RR-AML\_11

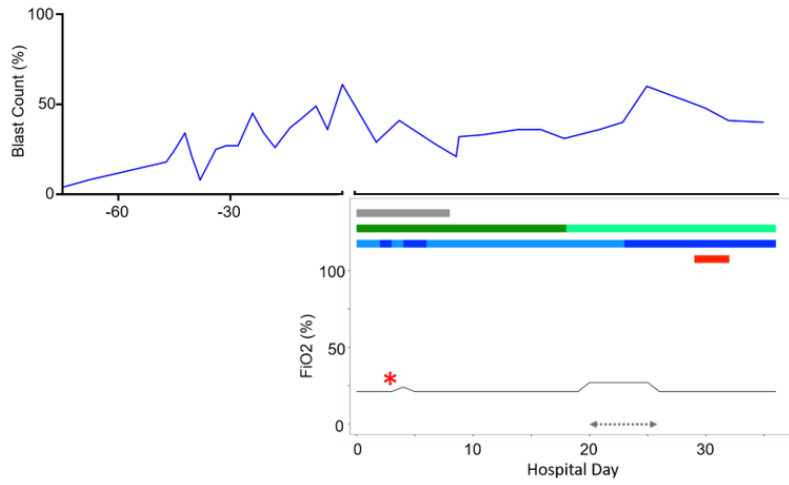

Supplement: Supplementary file [file media-1.pdf]
