# Supplementary material for: Indolent Presentations of Leukemic Lung Disease in Acute Myeloid Leukemia
Source: bioRxiv or medRxiv preprint supplement (doi:10.1101/2020.10.12.20211276), 2020-10-14

Figure E1: Flow diagram of patient selection process

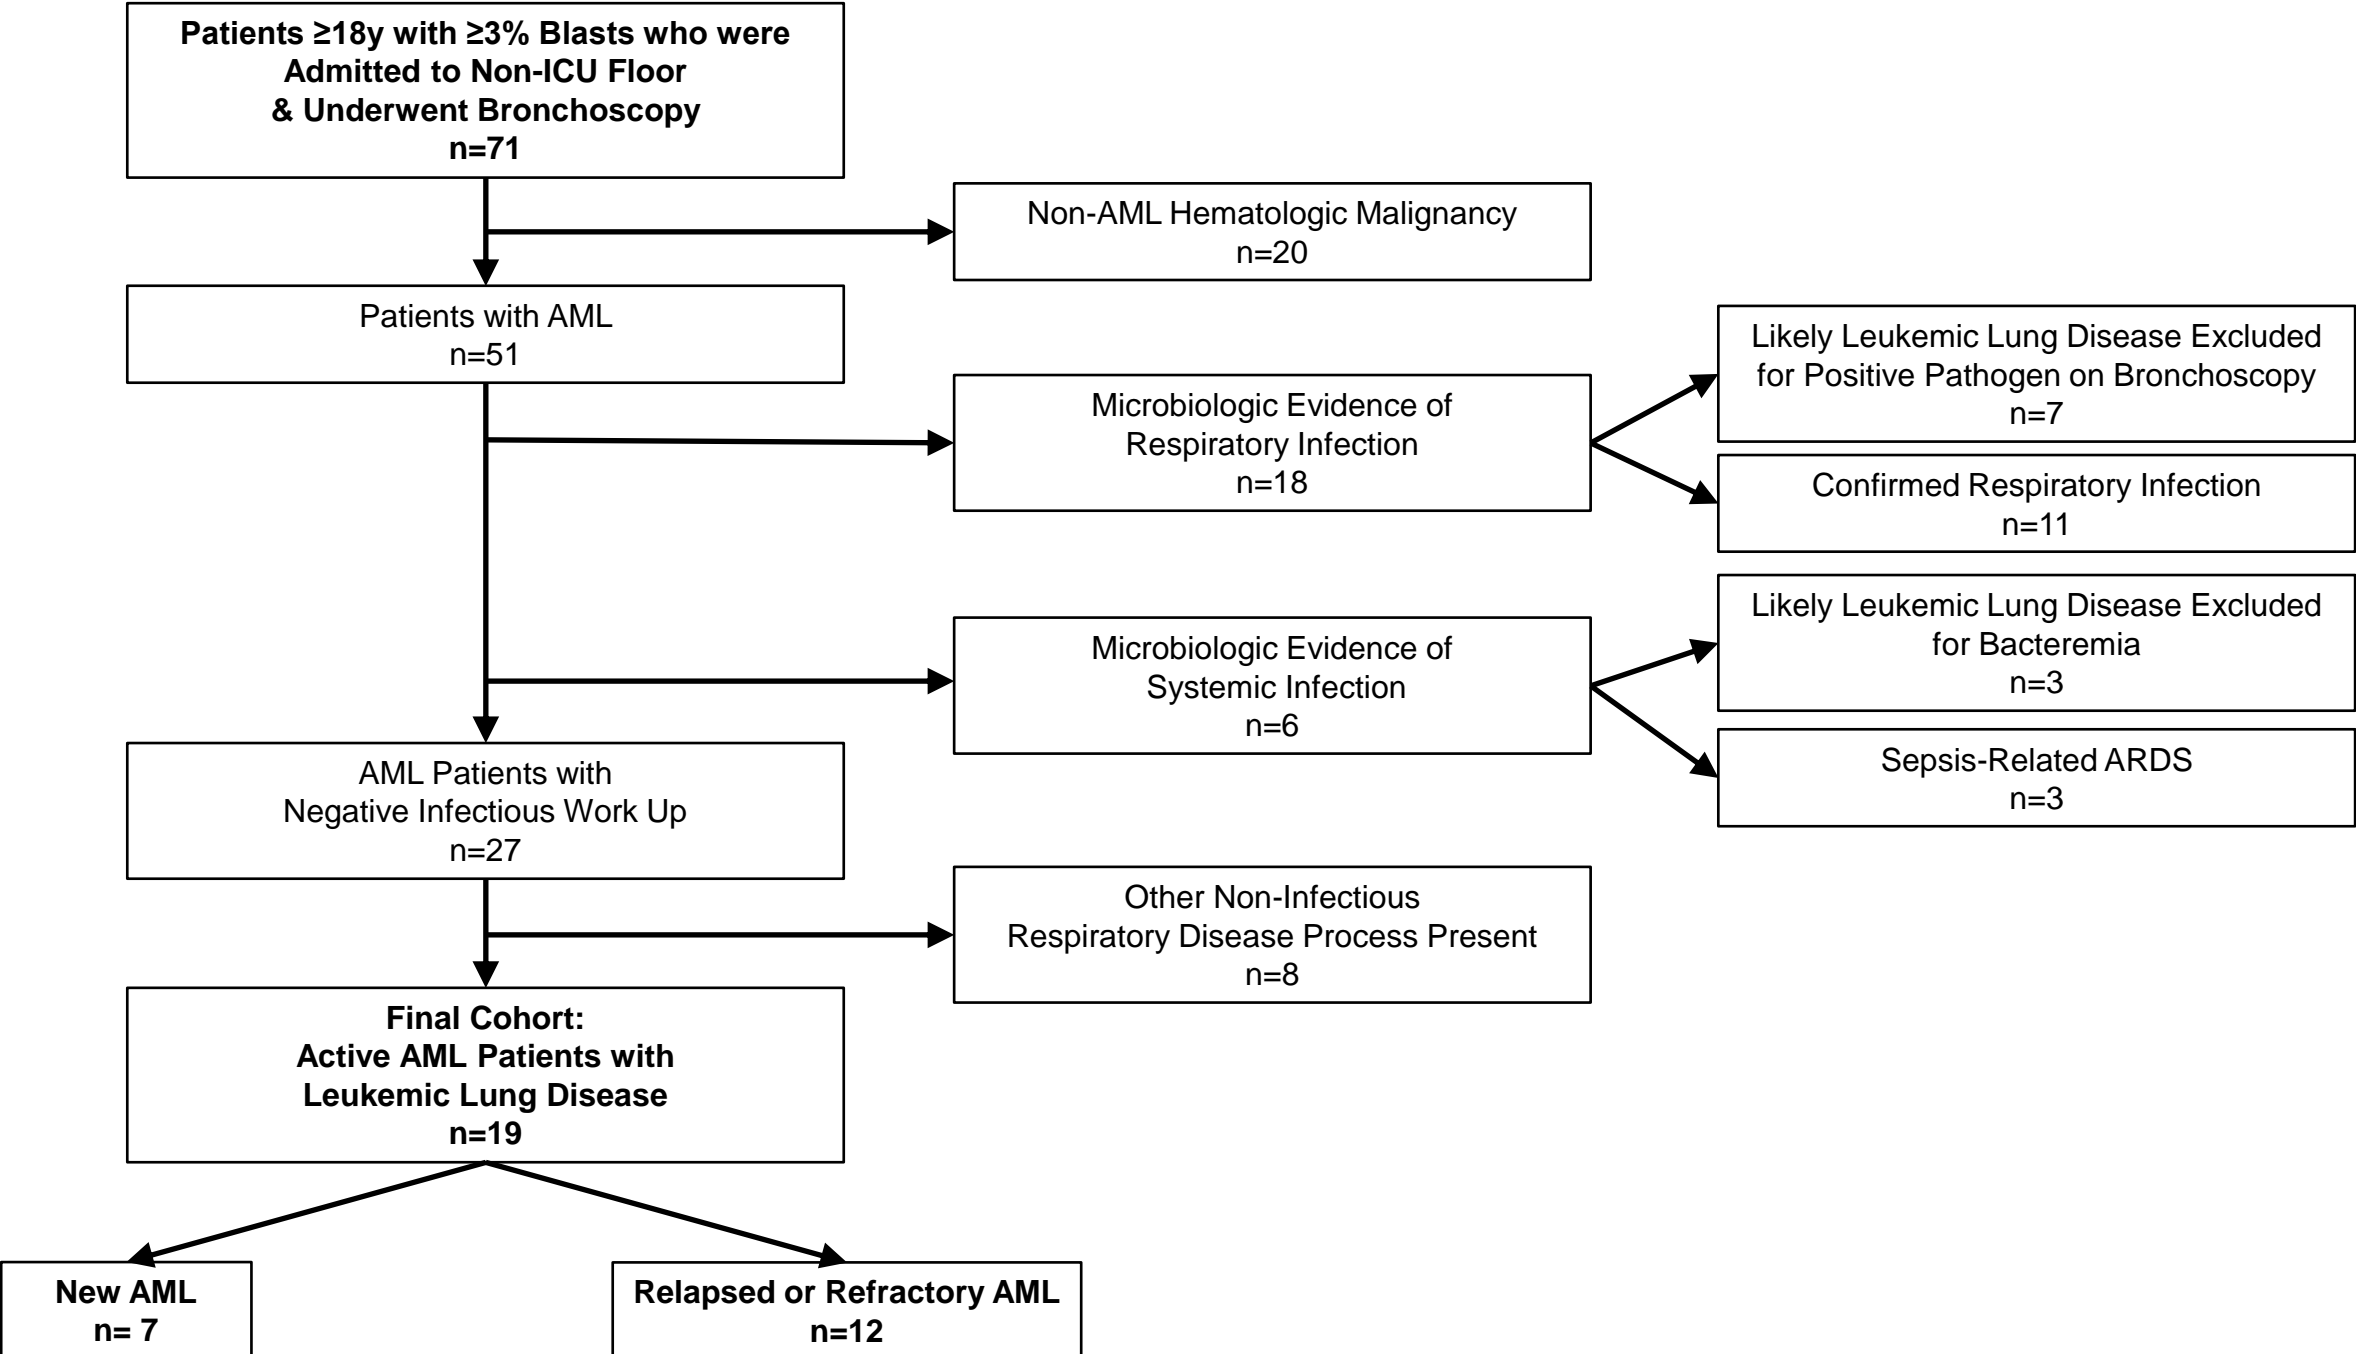

Supplement: Supplementary file [file media-2.pdf]
